# Supplementary material
Source: PubMed Central journal article supplement (PMC3579457)
Supplement: jm301495v_si_001.pdf [file jm301495v_si_001.pdf]

# **Comparative structural and functional studies of 4-(thiazol-5-yl)-2-(phenylamino)pyrimidine-5-carbonitrile CDK9 inhibitors suggest the basis for isotype selectivity**

*Alison J. Hole, Sonja Baumli, Hao Shao, Shenhua Shi, Shiliang Huang, Chris Pepper, Peter M. Fischer, Shudong Wang, Jane A. Endicott, Martin E. Noble*

Figure S1. Representative thermal denaturation profiles

Figure S2. Inhibitor binding to CDK9330/cyclin T and CDK2/cyclin A

Table S1. Crystallographic data collection and refinement statistics

## SUPPLEMENTARY FIGURES

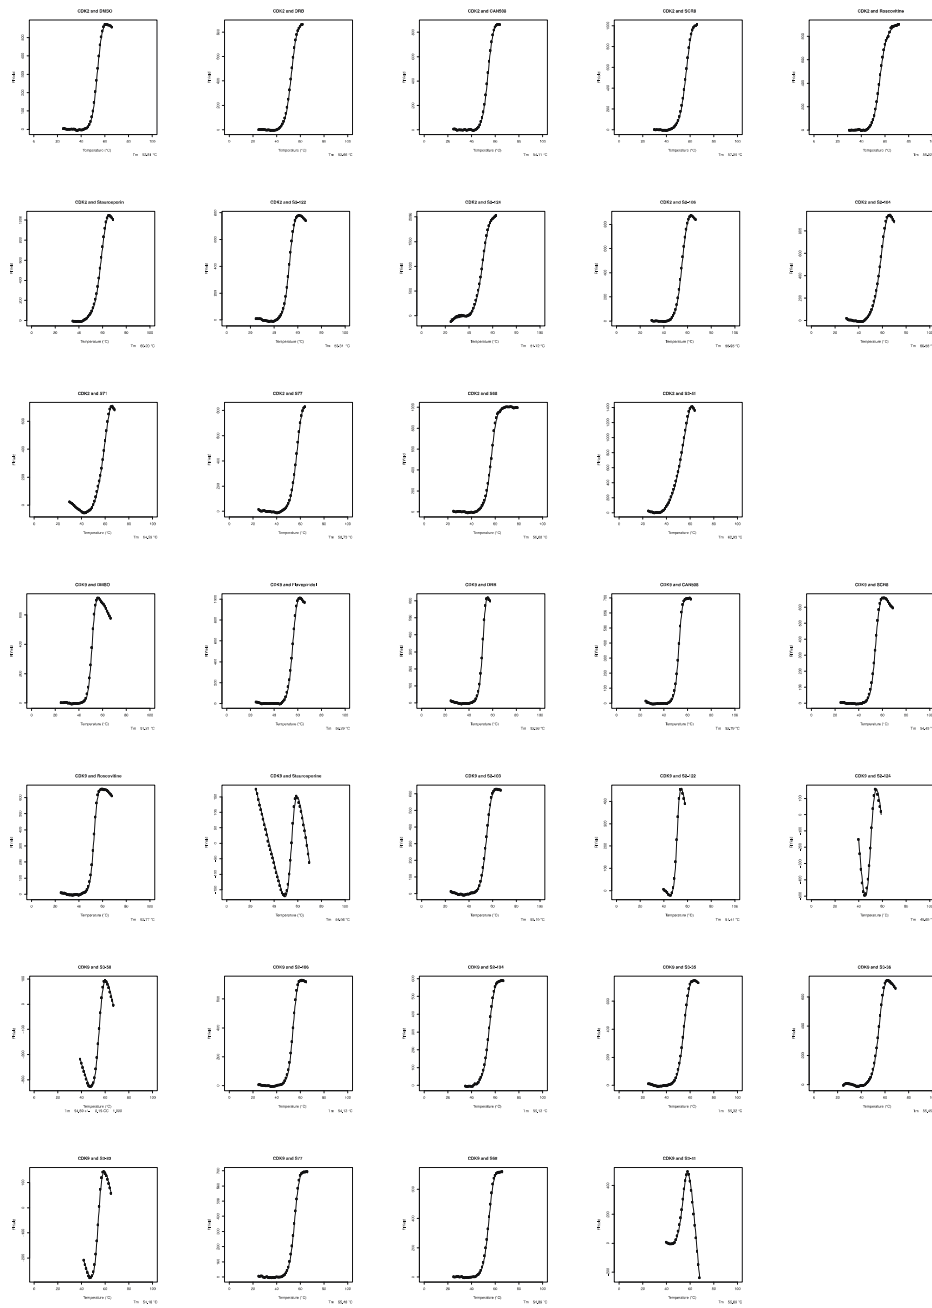

**Supplemental Figure S1. Representative thermal denaturation profiles.** Thermal denaturation curves of CDK2/cyclin A and CDK9/cyclin T in the presence of inhibitors. Original data points and the fitted curve are shown for one representative assay. Figure associated with Figure 1.

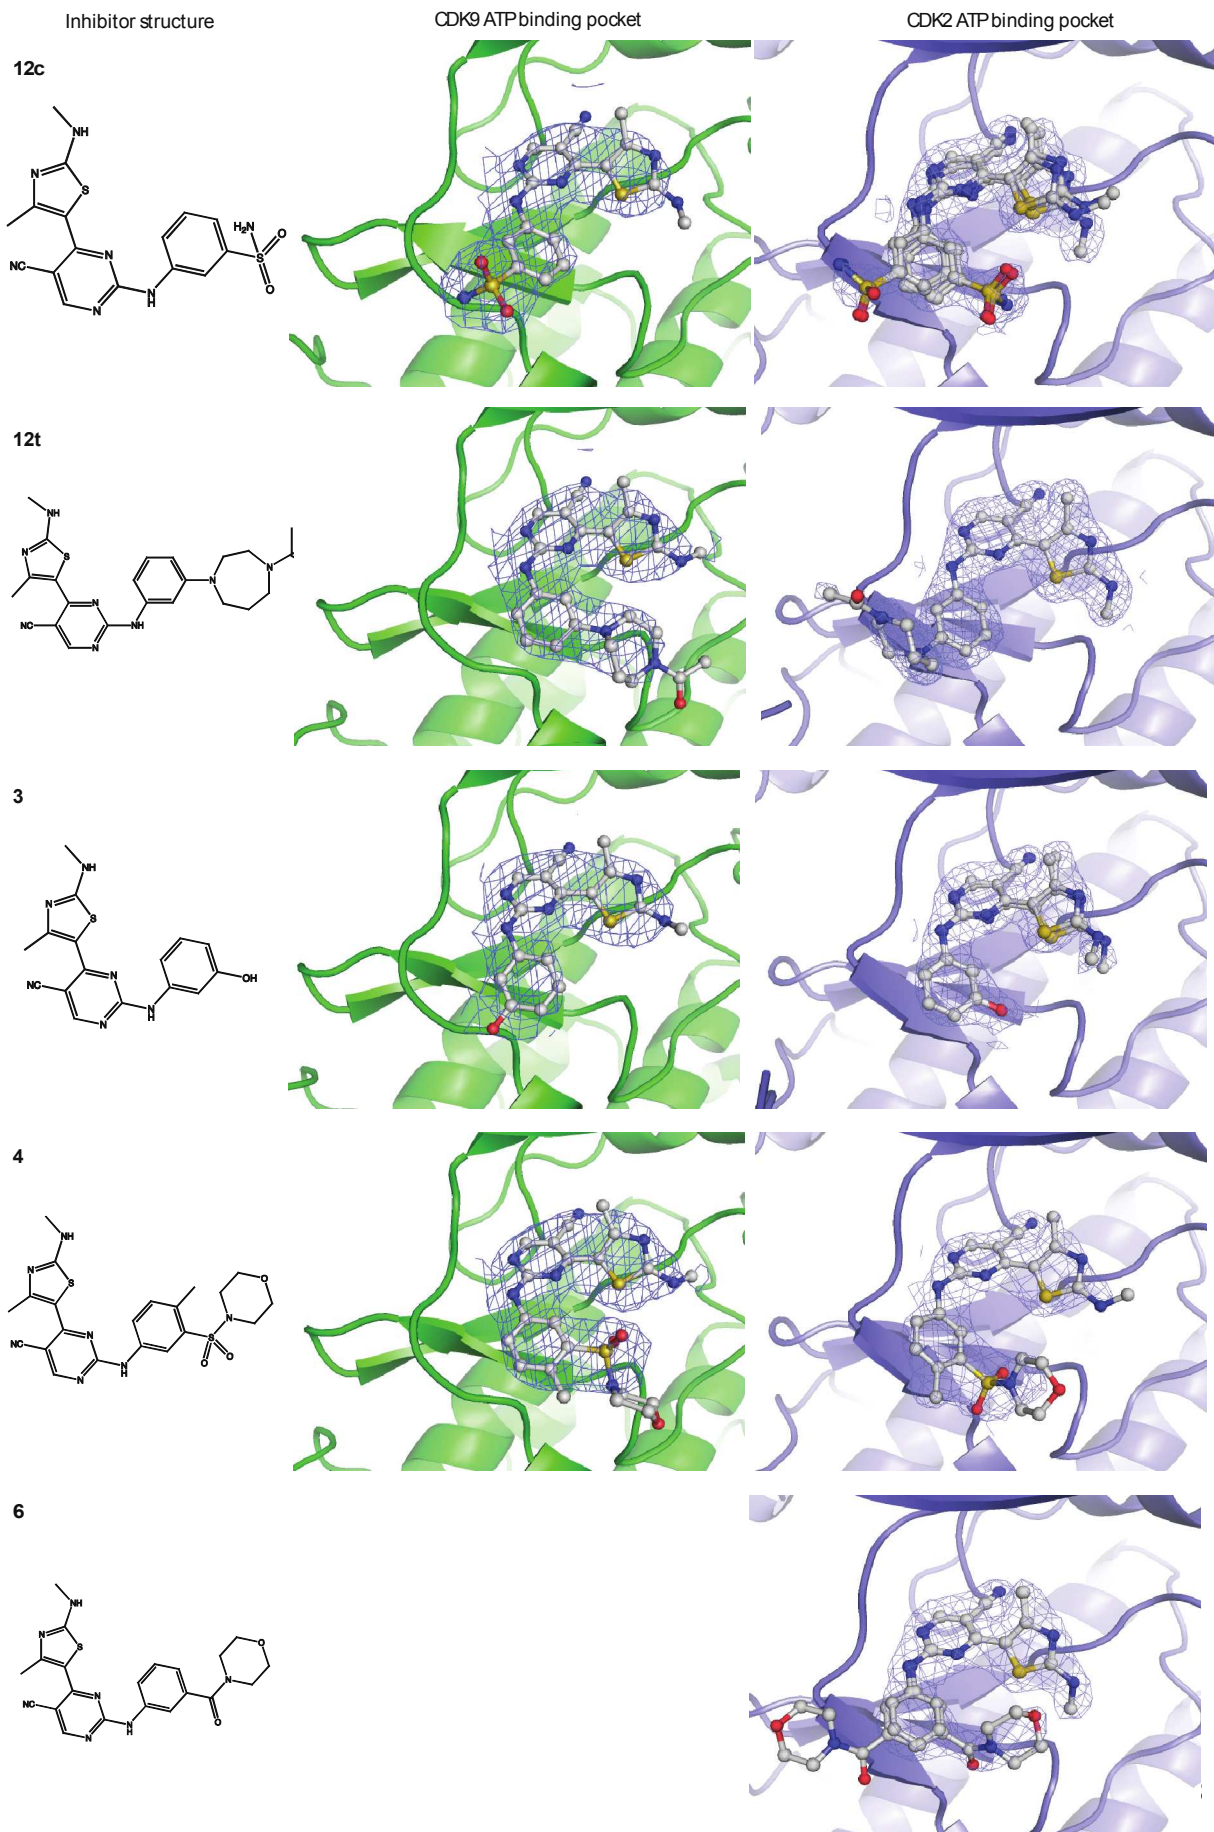

**Supplemental Figure S2. Inhibitor binding to CDK9<sub>330</sub>/cyclin T and CDK2/cyclin A.** For each inhibitor the chemical structure is drawn together with their structures as bound within the ATP binding site of CDK9<sub>330</sub>/cyclin T (middle panels) and CDK2/cyclin A (RHS panels). CDK9<sub>330</sub>/cyclin T and CDK2/cyclin A are drawn in ribbon representation and coloured green and blue respectively. The inhibitor electron density in the final 2mF<sub>o</sub>-DF<sub>c</sub> maps is contoured at 1σ. The same view is taken of each co-complex structure. The electron density maps of **12c** and **6** bound to CDK2/cyclin A support a model in which the inhibitors adopt two alternative conformations within the CDK2 active site.

## SUPPLEMENTARY TABLES

**Supplementa1 Table S1. Crystallographic data collection and refinement statistics.**

|                                           | CDK2/cyc A/12c                                                                            | CDK2/cyc A/12t                                                                            | CDK2/cyc A/3                                                                              |
|-------------------------------------------|-------------------------------------------------------------------------------------------|-------------------------------------------------------------------------------------------|-------------------------------------------------------------------------------------------|
| <b>Data collection</b>                    |                                                                                           |                                                                                           |                                                                                           |
| Beam line                                 | Diamond I-04                                                                              | Diamond I-03                                                                              | Diamond I-02                                                                              |
| Space group & unit cell (Å)               | P2 <sub>1</sub> 2 <sub>1</sub> 2 <sub>1</sub><br>a=77.20; b=140.37;<br>c=155.17 α=β=γ=90° | P2 <sub>1</sub> 2 <sub>1</sub> 2 <sub>1</sub><br>a=73.90; b=133.81;<br>c=148.38 α=β=γ=90° | P2 <sub>1</sub> 2 <sub>1</sub> 2 <sub>1</sub><br>a=74.05; b=135.08;<br>c=148.19 α=β=γ=90° |
| Resolution (highest resolution shell) (Å) | 29.86-2.05<br>(2.16-2.05)                                                                 | 52.36-2.05<br>(2.16-2.05)                                                                 | 49.91-2.10<br>(2.21-2.10)                                                                 |
| Total observations                        | 381071 (37285)                                                                            | 296524 (43881)                                                                            | 350905 (51105)                                                                            |
| Unique                                    | 101828 (12695)                                                                            | 92057 (13331)                                                                             | 87330 (12605)                                                                             |
| R <sub>merge</sub>                        | 0.044 (0.544)                                                                             | 0.080 (0.537)                                                                             | 0.085 (0.549)                                                                             |
| Multiplicity                              | 3.7 (2.9)                                                                                 | 3.2 (3.3)                                                                                 | 4.0 (4.1)                                                                                 |
| Mean I/s <sub>i</sub>                     | 17.9 (2.0)                                                                                | 8.6 (2.0)                                                                                 | 11.9 (2.5)                                                                                |
| Completeness (%)                          | 96.5 (83.7)                                                                               | 99.2 (99.4)                                                                               | 99.9 (99.9)                                                                               |
| <b>Refinement Statistics</b>              |                                                                                           |                                                                                           |                                                                                           |
| (highest resolution shell) (Å)            | (2.08-2.05)                                                                               | (2.07-2.05)                                                                               | (2.12-2.10)                                                                               |
| Total number of atoms                     | 9877                                                                                      | 9356                                                                                      | 9678                                                                                      |
| Number of waters                          | 629                                                                                       | 519                                                                                       | 687                                                                                       |
| R                                         | 19.32 (32.17)                                                                             | 18.87 (24.92)                                                                             | 18.38 (25.19)                                                                             |
| R <sub>free</sub>                         | 23.58 (37.47)                                                                             | 22.60 (28.48)                                                                             | 21.91 (28.26)                                                                             |
| Rms bonds (Å)                             | 0.023                                                                                     | 0.005                                                                                     | 0.004                                                                                     |
| Rms angles (°)                            | 1.675                                                                                     | 0.902                                                                                     | 0.774                                                                                     |

|                                           | CDK2/cyc A/4                                                                                                   | CDK2/cyc A/6                                                                                                   | CDK9/cyc T/12c                                                            |
|-------------------------------------------|----------------------------------------------------------------------------------------------------------------|----------------------------------------------------------------------------------------------------------------|---------------------------------------------------------------------------|
| <b>Data collection</b>                    |                                                                                                                |                                                                                                                |                                                                           |
| Beam line                                 | Diamond I-02                                                                                                   | Diamond I-04                                                                                                   | Diamond I-02                                                              |
| Space group & unit cell (Å)               | P2 <sub>1</sub> 2 <sub>1</sub> 2 <sub>1</sub><br>a=74.07; b=135.41;<br>c=148.63 $\alpha=\beta=\gamma=90^\circ$ | P2 <sub>1</sub> 2 <sub>1</sub> 2 <sub>1</sub><br>a=77.08; b=141.16;<br>c=155.52 $\alpha=\beta=\gamma=90^\circ$ | H3<br>a=b=174.11; c=99.26<br>$\alpha=\beta=90^\circ$ ; $\gamma=120^\circ$ |
| Resolution (highest resolution shell) (Å) | 59.54-2.45 (2.58-2.45)                                                                                         | 52.26-2.40 (2.53-2.40)                                                                                         | 60.04-3.10 (3.27-3.10)                                                    |
| Total observations                        | 191491 (28077)                                                                                                 | 209450 (25810)                                                                                                 | 73375 (10822)                                                             |
| Unique                                    | 55186 (7979)                                                                                                   | 65528 (8880)                                                                                                   | 20202 (2943)                                                              |
| R <sub>merge</sub>                        | 0.107 (0.534)                                                                                                  | 0.127 (0.464)                                                                                                  | 0.064 (0.593)                                                             |
| Multiplicity                              | 3.5 (3.5)                                                                                                      | 3.2 (2.9)                                                                                                      | 3.6 (3.7)                                                                 |
| Mean I/s <sub>i</sub>                     | 7.3 (2.1)                                                                                                      | 5.1 (1.7)                                                                                                      | 10.8 (2.0)                                                                |
| Completeness (%)                          | 99.3 (99.7)                                                                                                    | 97.9 (93.0)                                                                                                    | 99.3 (99.5)                                                               |
| <b>Refinement Statistics</b>              |                                                                                                                |                                                                                                                |                                                                           |
| (highest resolution shell) (Å)            | (2.51-2.45)                                                                                                    | (2.43-2.40)                                                                                                    | (3.18-3.10)                                                               |
| Total number of atoms                     | 9111                                                                                                           | 9271                                                                                                           | 4597                                                                      |
| Number of waters                          | 287                                                                                                            | 331                                                                                                            | 8                                                                         |
| R                                         | 19.59 (32.07)                                                                                                  | 21.52 (32.05)                                                                                                  | 17.77 (32.6)                                                              |
| R <sub>free</sub>                         | 25.80 (37.14)                                                                                                  | 25.18 (37.48)                                                                                                  | 22.13 (42.9)                                                              |
| Rms bonds (Å)                             | 0.006                                                                                                          | 0.004                                                                                                          | 0.009                                                                     |
| Rms angles (°)                            | 0.964                                                                                                          | 0.800                                                                                                          | 1.125                                                                     |

**Supplemental Table S1**

|                                           | CDK9/cyc T/ <b>12t</b>                                                 | CDK9/cyc T/ <b>3</b>                                                   | CDK9/cyc T/ <b>4</b>                                                   |
|-------------------------------------------|------------------------------------------------------------------------|------------------------------------------------------------------------|------------------------------------------------------------------------|
| <b>Data collection</b>                    |                                                                        |                                                                        |                                                                        |
| Beam line                                 | Diamond I-03                                                           | ESRF ID14-EH4                                                          | Diamond I-03                                                           |
| Space group & unit cell (Å)               | H3<br>a=b=172.32; c=98.82<br>$\alpha=\beta=90^\circ; \gamma=120^\circ$ | H3<br>a=b=174.59; c=99.42<br>$\alpha=\beta=90^\circ; \gamma=120^\circ$ | H3<br>a=b=174.18; c=98.30<br>$\alpha=\beta=90^\circ; \gamma=120^\circ$ |
| Resolution (highest resolution shell) (Å) | 82.39-3.01 (3.17-3.01)                                                 | 50.40-3.16 (3.33-3.16)                                                 | 87.09-2.96 (3.12-2.96)                                                 |
| Total observations                        | 61068 (8985)                                                           | 69409 (9897)                                                           | 121625 (18367)                                                         |
| Unique                                    | 20836 (3057)                                                           | 19246 (2800)                                                           | 23220 (3407)                                                           |
| R <sub>merge</sub>                        | 0.049 (0.386)                                                          | 0.104 (0.548)                                                          | 0.068 (0.581)                                                          |
| Multiplicity                              | 2.9 (2.9)                                                              | 3.6 (3.5)                                                              | 5.2 (5.4)                                                              |
| Mean I/s <sub>i</sub>                     | 13.5 (2.4)                                                             | 8.2 (2.1)                                                              | 16.3 (2.8)                                                             |
| Completeness (%)                          | 96.2 (96.6)                                                            | 99.6 (99.0)                                                            | 99.9 (99.9)                                                            |
| <b>Refinement Statistics</b>              |                                                                        |                                                                        |                                                                        |
| (highest resolution shell) (Å)            | (3.01-3.09)                                                            | (3.24-3.16)                                                            | (2.96-3.04)                                                            |
| Total number of atoms                     | 4597                                                                   | 4598                                                                   | 4617                                                                   |
| Number of waters                          | 14                                                                     | 6                                                                      | 13                                                                     |
| R                                         | 16.65 (25.7)                                                           | 15.94 (29.8)                                                           | 16.67 (28.2)                                                           |
| R <sub>free</sub>                         | 22.44 (25.2)                                                           | 20.73 (33.2)                                                           | 20.97 (31.8)                                                           |
| Rms bonds (Å)                             | 0.011                                                                  | 0.010                                                                  | 0.011                                                                  |
| Rms angles (°)                            | 1.556                                                                  | 1.379                                                                  | 1.566                                                                  |
